## Title Page:

Vascular calcification has a role in acute non-renal phosphate clearance

*Turner; Role of Vasculature in Acute Phosphate Clearance*

Mandy E Turner<sup>1</sup>, Austin P Lansing<sup>1</sup>, Paul S Jeronimo MSc<sup>1</sup>, Lok Hang Lee<sup>1</sup>, Bruno A Svajger PhD<sup>1</sup>, Jason GE Zelt PhD<sup>2,3</sup>, Corey M Forster MSc<sup>1,2</sup>, Martin P Petkovich PhD<sup>1</sup>, Rachel M Holden MD<sup>1,4</sup>, and Michael A Adams PhD<sup>1</sup>

<sup>1</sup>Department of Biomedical and Molecular Science, Queen's University, Kingston, ON, Canada

<sup>2</sup>Department of Cellular and Molecular Medicine, Faculty of Medicine, University of Ottawa, Ottawa, Canada

<sup>3</sup>Division of Cardiology, University of Ottawa Heart Institute and University of Ottawa, Ottawa, Canada

<sup>4</sup>Department of Medicine, Queen's University, Kingston, ON, Canada

*Corresponding Author:*

Dr. Michael A Adams

Department of Biomedical and Molecular Sciences

Queen's University

Kingston, ON

K7L 3N6

Tel: 613-533-2985

[adams@queensu.ca](mailto:adams@queensu.ca)

1 **Abstract**

2

3 **Rationale:** Non-renal extravasation of phosphate from the circulation and transient accumulation  
4 into tissues and extracellular fluid is a regulated process of acute phosphate homeostasis that is  
5 not well understood. Following oral consumption of phosphate, circulating levels normalize long  
6 before urinary excretion has been completed. This process is especially relevant in the setting of  
7 chronic kidney disease (CKD), where phosphate exposure is prolonged due to inefficient kidney  
8 excretion. Furthermore, CKD-associated dysregulation of mineral metabolism exacerbates  
9 pathological accumulation of phosphate causing vascular calcification (VC).

10

11 **Objective:** Determine whether the systemic response to acute phosphate challenges is altered by  
12 the development and progression of VC.

13

14 **Methods/Results:** Acute circulating and tissue deposition of an acute phosphate challenge was  
15 assessed in two rat models of VC using radio-labelled phosphate tracer. In an adenine-induced  
16 model of CKD with VC, animals with VC had a blunted elevation of circulating  $^{33}\text{PO}_4$  following  
17 oral phosphate administration and the discordant deposition could be traced to the calcifying  
18 vasculature. In a non-CKD model of VC, VC was induced with 0.5ug/kg calcitriol and then  
19 withdrawn. The radiolabelled phosphate challenge was given to assess for vascular preference  
20 for phosphate uptake with and without the presence of an active calcification stimulus. The new  
21 transport to the calcifying vasculature correlates to the pre-existing burden of calcification, and  
22 can be substantially attenuated by removing the stimulus for calcification. The accrual is  
23 stimulated by a phosphate challenge, and not present in the same degree during passive  
24 disposition of circulating phosphate.

25

26 **Conclusions:** Our data indicate that calcifying arteries alter the systemic disposition of a  
27 phosphate challenge and acutely deposit substantial phosphate. This study supports the  
28 importance of diet as it relates to acute fluctuations of circulating phosphate and the importance  
29 of bioavailability and meal-to-meal management in CKD patients as a mediator of cardiovascular  
30 risk.

31

32 **Key Words:** vascular calcification, phosphate, chronic kidney disease, circulation, medial  
33 calcification

## 1 **Introduction**

2           Medial vascular calcification (VC) is a pathology associated with aging, and is  
3 accelerated by diabetes and chronic kidney disease (CKD). Distinct from intimal calcification  
4 associated with atherosclerosis, in this pathology hydroxyapatite is actively deposited in the  
5 media and elastic lamina of muscular arteries. This pathology reduces vascular compliance and  
6 associates with poor cardiovascular outcomes<sup>1,2</sup>. Phosphate dysregulation has emerged as an  
7 important factor in the initiation and propagation of the calcification process. Serum phosphate,  
8 even in the upper ranges of normal, and at each stage of CKD, is recognized as an independent  
9 risk factor for cardiovascular disease<sup>3</sup>. Prevalence of VC in the thoracic aorta ranges from 37-  
10 60% in patients with stage 3 CKD when serum phosphate still within the normal range<sup>4</sup>.

11           Despite the growing recognition of circulating phosphate as a risk factor, less than 1% of  
12 total body phosphate content is found in the circulation. The tight regulation of circulating  
13 phosphate involves controlled movement within and between several compartments. These pools  
14 of phosphate typically include intestinal absorption of dietary phosphate, the movement of  
15 phosphate between skeletal, soft tissue and extracellular pools, and regulation of renal  
16 reabsorption and excretion. Phosphate transport in and out of these compartments is mediated, in  
17 part, through sodium phosphate-cotransporters (NaPi), as well as ubiquitous somatic phosphate  
18 inorganic transporters, PiT-1 and PiT-2. The activity and expression of NaPis are largely  
19 regulated by parathyroid hormone (PTH), fibroblast growth factor 23 (FGF-23) and calcitriol.  
20 Though not well understood, phosphate also undergoes paracellular transport along a  
21 concentration gradient in the intestine, an aspect of phosphate disposition which may be  
22 underestimated in CKD and potentially present in other tissues. Despite the clear role of

1 phosphate in stimulating adaptive changes in its own regulation, the cellular mechanisms of  
2 phosphate-sensing remain poorly understood in somatic tissue<sup>5</sup>.

3         As kidney function declines, hormonal control mechanisms become unable to  
4 compensate and the resultant increase in circulating phosphate stresses cellular mechanisms of  
5 phosphate handling. The rise in circulating phosphate can occur acutely after a meal or, in later  
6 stages of CKD, present as chronic hyperphosphatemia. In a recent study using a rat model of  
7 CKD, the impact of oscillating from high to low dietary phosphate every two days resulted in  
8 VC much more severe than rats fed the same amount of phosphate without oscillations<sup>6</sup>. The  
9 burden of VC was comparable to that found in rats fed a continuously high dietary phosphate  
10 containing twice the overall amount of the oscillating burden. These findings suggest spikes in  
11 circulating phosphate may be an important driver of VC, potentially more important than overall  
12 exposure.

13         Our previous work indicates that acute responses to oral phosphate are already altered in  
14 mild to moderate CKD patients with normal serum phosphate<sup>7</sup>. Specifically, humans and rats  
15 with impaired kidney function but normal serum phosphate had a blunted elevation in their  
16 circulating phosphate following an oral phosphate challenge compared to those with health  
17 kidney function. Given that functional changes in phosphate absorption are not impaired in  
18 CKD<sup>8</sup>, this attenuated rise suggested that there were changes in the systemic distribution of the  
19 oral phosphate load in those with impaired kidney function, but did not provide evidence of the  
20 mechanism for this increased non-renal clearance.

21         There is little evidence for how a given tissue or organ is involved in the systemic  
22 disposition of phosphate following administration of an oral load, or how these processes are  
23 altered during the development of VC. In the present study, the objective was to determine whether

1 the systemic response to acute phosphate challenges is altered by the development and progression  
2 of VC.

3

#### 4 **Methods**

5 All animal procedures were performed in accordance with the Canadian Council on Animal Care  
6 and were approved by Queen's Animal Care Committee. Male Sprague Dawley rats (15-16  
7 weeks, Hilltop Lab Animals Inc. PA, USA) were acclimated for a week prior to the start of the  
8 experiment and were individually housed and maintained on a 12-hour light/dark cycle  
9 throughout the duration of the study.

10

11 *Adenine-Induced CKD Model of Vascular Calcification:* A chronic reduction in kidney function  
12 was induced using a 0.25% dietary adenine model for 5 weeks as previously described<sup>9</sup> (Harland  
13 Teklad, TD.08672). A parallel control arm was ran concurrently without the dietary adenine, but  
14 otherwise identical diets (CON). After cessation of the adenine diet, animals were maintained on  
15 the non-adenine 0.5% phosphate diet for at least 4 days to ensure removal of the acute effects of  
16 dietary adenine (TD.150555), and then, at the sixth week, CKD and CON rats were stratified into  
17 high or low dietary phosphate according to bodyweight, circulating calcium and phosphate. The  
18 low dietary phosphate group remained on the 0.5% dietary formulation (LP) and the high dietary  
19 phosphate (HP) increased to 1% dietary phosphate (TD.08670) for two weeks. Blood was  
20 collected at least weekly from the saphenous vein. The total number of animals in each group  
21 are: CON-LP (N=13), CON-HP (N=11) CKD-LP (N=23) and CKD-HP (N=23).

22

1 *Administration of Oral Radiolabelled Phosphate:* Two weeks following stratification into the  
2 dietary phosphate arms, animals were euthanized following an oral radiolabelled phosphate  
3 challenge. Animals were partially-fasted overnight to ensure consistency of stomach contents  
4 and then in the morning, animals were provided 2mL of sucralose gel (MediGel®, Clear H<sub>2</sub>O)  
5 with a total phosphate amount of 0.1g (equivalent to 100% daily intake of the LP animals, or  
6 50% daily intake of HP animals). Phosphate in the gel was supplemented with dibasic and  
7 monobasic sodium phosphate salts (Sigma-Aldrich, Canada) and ~7.76 million Bq radio-labeled  
8 <sup>33</sup>PO<sub>4</sub> (NEN Radiochemicals). Animals were stratified by the three most recent measurements of  
9 serum creatinine, phosphate, calcium and bodyweight into one of three sacrifice times following  
10 the oral load of phosphate: 0 hour, 2 hours or 6 hours. Stratification metrics and final study  
11 animal numbers for each time point are outlined in Supplementary Table 1. Depending on  
12 sacrifice time, animals were sampled from the saphenous vein at 0, 20min, 40min, 1hr, 1.5hr, 2hr  
13 and then hourly until 6hr. Only two rats in the CKD-LP diet presented with VC and both animals  
14 were allocated *a priori* to the 6hr sacrifice time point. As a result, animals were excluded from  
15 analysis in Figures 2-3, as inclusion would have biased the vascular phosphate deposition  
16 findings for 6hr (but not 2hr) in CKD-LP animals. The rats sacrificed at 2 hours did not present a  
17 different profile than rats sacrificed at 6 hours (Supplementary Figure 1 and 2), as such  
18 Figure 2A-E presents the pooled combined profile of both groups at 0-2hr and statistics represent  
19 combined analysis.

20

21 *Non-CKD Calcitriol-Induced Model of Vascular Calcification:* VC was induced through  
22 subcutaneous administration of suprapharmacological calcitriol (0.5µg/kg/day, Sterimax) for 8-  
23 days and maintained on a moderate 0.75% phosphate diet (Harland Teklad, TD.160324). A

1 parallel control arm was completed concurrently. At day 7, animals (N=24) were stratified based  
2 on serum calcium, phosphate, PTH, FGF-23 and bodyweight into two time-points. The first  
3 group was sacrificed on experimental day 9, following 8 doses of calcitriol (Cx). The remaining  
4 rats no longer received calcitriol for 13 days (Post-Cx). Control animals were sacrificed at both  
5 time points and then combined due to no differences in any measurement. The number of  
6 animals in each group were: Cx (N=8), Post-Cx (N=9), Control Early (N=3), and Control Late  
7 (N=4). Blood was collected every 2-3 days via saphenous vein.

8  
9 *IV Radiolabelled Phosphate Administration* Directly prior to sacrifice, animals were  
10 administered an intravenous load of radiolabelled phosphate. Intravenous delivery was chosen to  
11 bypass the potential effects of supraphysiologic calcitriol on gut phosphate transport. Under  
12 isoflurane anesthesia (2.5%, 2% O<sub>2</sub>), rats were administered 3mL of an isotonic sodium  
13 phosphate/sodium chloride solution containing 300μmol of phosphate and ~9.7 million Bq of  
14 <sup>33</sup>PO<sub>4</sub> (NEN Radiochemicals, Perkin Elmer) was infused intravenously into the jugular vein over  
15 10 minutes (KD Scientific). Blood was sampled at baseline, 10 minutes, 20 minutes, and  
16 sacrifice (30 minutes).

17 A separate study was completed involving administering calcitriol subcutaneously via  
18 osmotic minipump (Alzet, 2mL capacity, 10μL/hr flow rate, 0.5μg/kg/day). Aside from method  
19 of administration, all other protocols were identical to the aforementioned first study. Under  
20 isoflurane anesthesia, the osmotic minipump was inserted on the back dorsolaterally, and  
21 subcutaneous meloxicam (2mg/kg loading, 1mg/kg maintenance) was administered pre- and  
22 post-operatively for 3 days. Animals were sacrificed 9 days after pump insertion. Animals were  
23 stratified into two groups based on serum calcium, phosphate, PTH, FGF-23 and bodyweight at

1 day 7. One group (N=6) received the intravenous infusion of a 300 $\mu$ mol phosphate spiked with  
2 radiolabeled phosphate as described above. The second group (N=6) received an infusion of  
3 only the tracer amount of radiolabeled phosphate in saline, but lacking the phosphate load.

4  
5 *Tissue Harvest and Tissue Assessment Preparation:* Animals were anesthetized with isoflurane  
6 (5%) and sacrificed via cardiac puncture and exsanguination. Urine was collected directly from  
7 the bladder. Gastrointestinal tissue from the stomach to anus was quickly excised and separated.  
8 Samples of chyme were collected from the stomach, proximal small intestine (duodenum) and  
9 distal small intestine (ileum) and large intestine. Feces was collected from the distal colon.

10 Multiple somatic tissue types were collected (n=50) including various samples of arteries, veins,  
11 cardiac and skeletal muscles, bone, kidney, fat, intestine, liver, pancreas, and lung. Tissues and  
12 chyme were demineralized in 1N HCl for 1 week and minerals and radioactivity were measured  
13 in the acid homogenate.

14  
15 *Biochemical blood and urinary measurements:* Serum creatinine as well as both serum and  
16 urinary calcium and phosphate were evaluated spectrophotometrically (SynergyHT Microplate  
17 Reader). Creatinine was evaluated using the Jaffe method (QuantiChrom Creatinine Assay Kit,  
18 Bioassay Systems). Serum and tissue calcium was measured using the o-cresolphthalein  
19 method<sup>10</sup> and free phosphate was measured using the malachite green (Sigma-Aldrich) method  
20 as described by Heresztyn and Nicholson<sup>11</sup>. Plasma levels of intact PTH and C-terminal/intact  
21 FGF-23 were measured by ELISA (Immunotopics Inc.).

22



1 *Radioactivity measurement and analysis:* For radioactivity assessments, tissue acid  
2 homogenates, serum, and urine samples were added to Ultima Gold AB scintillation cocktail  
3 (Perkin Elmer) and analyzed using a Beckman Coulter LS 6500 multi-purpose scintillation  
4 counter. Each sample was measured twice for a 1-minute count time. Corrected radioactivity was  
5 obtained by subtracting background from all samples and then normalized to the amount of  
6 radioactivity ingested by each rat. Serum specific activity was calculated at each time point over  
7 the course of the study (equation 1). In order to transform counts/mg of tissue to an estimation of  
8 amount of phosphate accrued per tissue, a time-weighted average serum specific activity was  
9 generated and was used to estimate tissue phosphate accrual (equation 2) as described  
10 previously<sup>12</sup>.

11 (1) Serum Specific Activity ( $\mu\text{Ci}/\text{pmol}$ ) = Serum Radioactivity ( $\mu\text{Ci}/\text{uL}$ ) / Serum Phosphate  
12 (mM)

13 (2) Tissue  $\text{PO}_4$  Accrual ( $\text{pmol PO}_4/\text{mg tissue}$ ) = Tissue Radioactivity ( $\mu\text{Ci}/\text{mg tissue}$ ) /  
14 Average Specific Activity ( $\mu\text{Ci}/\text{pmol}$ )

15

16 *Von Kossa Histology:* The arteries were fixed in 10X neutral phosphate-buffered saline with 4%  
17 paraformaldehyde and embedded in paraffin blocks. Sections (4  $\mu\text{m}$ ) were stained for  
18 calcification using the Von Kossa method as previously described<sup>13</sup>. Areas of calcification  
19 appeared as dark brown regions in the medial wall of the artery.

20

21 *Analysis:*

1 Text data is represented as mean±SD, unless otherwise indicated. The threshold for significance  
2 was a p-value <0.05. All statistical tests and graph generation were done on GraphPad Prism  
3 (Version 8.4). Statistics performed are outlined in detail in figure captions and table footnotes.

4

## 5 **Results**

6 The dietary-adenine model of CKD was confirmed by elevated serum creatinine (Table  
7 1). CKD rats also had elevated serum phosphate, PTH, and FGF-23 that was exacerbated by the  
8 addition of high dietary phosphate (CKD-HP), compared to controls. A chronic increase in  
9 dietary phosphate did not significantly alter any of the measured parameters in control animals.  
10 Assessments of weekly increases in serum creatinine and phosphate are presented in  
11 Supplementary Figure 3.

12 High dietary phosphate in CKD animals induced consistent medial layer vascular  
13 calcification (VC), as indicated by substantial elevations of calcium and phosphate in both  
14 central (22/23; 96%) and distal arteries (23/23, 100%). This finding was confirmed  
15 histologically using von Kossa staining (Figure 1A-C). The rats fed low phosphate (CKD-LP)  
16 were not significantly different from controls, with only two rats (2/23, 8.7%) developing  
17 detectable VC. Taken together with circulating markers, the high dietary-phosphate group with  
18 adenine-induced CKD had changes characteristic of CKD-MBD.

19 In response to the oral phosphate load, total serum phosphate increased acutely in all  
20 groups, although only significantly in CKD, which occurred at 1hr and remained elevated for the  
21 remainder of the 6 hr analysis. At all points, total circulating phosphate is higher in CKD-HP  
22 than CKD-LP (Figure 2A), however, the chronic dietary phosphate did not impact the magnitude  
23 of the absolute change in circulating phosphate at any time points (Figure 2B). In contrast, the

1 chronic change in dietary phosphate altered the responsiveness of PTH to the acute oral  
2 phosphate load. That is, only in the rats on low phosphate diet did the PTH rise significantly  
3 from baseline in response to the acute phosphate load at 1 hour (Figure 2C-D). Circulating FGF-  
4 23 was not significantly increased by the acute phosphate load (Supplementary Figure 4). There  
5 were minimal changes in serum calcium at the measured time points (Supplementary Figures 1,  
6 2).

7 Consistent with declining kidney function, circulating  $^{33}\text{PO}_4$  elevated more in the CKD  
8 rats than in the controls (Figure 2E, statistics not shown). However, there was also significant  
9 impact ( $p < 0.05$ , Three-way ANOVA) of chronically increasing the dietary phosphate on the  
10 circulating  $^{33}\text{PO}_4$ . Specifically, there was a blunted elevation of circulating  $^{33}\text{PO}_4$  in the CKD-HP  
11 group at 1.5 and 2 hours.

12 As expected, renal phosphate clearance was decreased in CKD rats compared to controls  
13 (Figure 2F). Control animals with consuming increased dietary phosphate appeared to have  
14 more robust urinary excretion of phosphate, as measured by  $^{33}\text{PO}_4$ . There is no evidence of  
15 altered calcium excretion following the oral load of phosphate in CKD animals (Supplementary  
16 Figure 5).

17 Chyme radioactivity was used as a marker of the absorption/intestinal excretion profile of  
18 the acute phosphate load. There was no measurable impact of CKD or the chronic dietary  
19 phosphate on this profile (Figure 2G, Three-way ANOVA). In all groups, at 2 hours, there is  
20 significantly higher amount of  $^{33}\text{PO}_4$  in the chyme and small intestine and very little in the feces.  
21 The opposite is true at 6 hours, at which time there is significant fecal  $^{33}\text{PO}_4$ . The 2-hour time  
22 point reflects the status during absorption and the 6-hour time point reflects the status after most  
23 intestinal absorption has already occurred.

1           Figure 2H depicts estimated amount of *de novo* phosphate across all tissues at 2 and 6  
2 hours in each treatment group. Tissues were grouped according to function and/or location.  
3 Supplementary Figure 7 is a grey-scale depiction of the heat map. Across all treatment groups  
4 and dietary phosphate interventions, the most substantial localization occurred in the bone,  
5 kidneys, liver and cardiac muscle.

6           At both 2 and 6 hours following the oral load, there was a significant impact of dietary  
7 phosphate on the *de novo* phosphate accrual in the arteries, whereby accrual was markedly  
8 elevated in CKD animals fed a high phosphate diet, compared to those fed a low phosphate diet  
9 or control (Figure 3A). This finding was consistent throughout the vascular tree. The accrual in  
10 the vasculature of the CKD animals fed a low phosphate diet, which were uncalcified, was  
11 similar to that of the controls. There was no difference in accrual between 2 and 6 hours in any of  
12 the treatment groups.

13           In contrast, while there was no impact of dietary phosphate on the *de novo* accrual  
14 phosphate in the bone, there was an impact of CKD treatment and time of sacrifice (Figure 3B).  
15 Specifically, in each group there was more accrual at 6 hours than at 2 hours, which was  
16 exacerbated by CKD, likely a result of reduced clearance capacity. The arterial-to-bone accrual  
17 ratio exceeds 1 in CKD-HP, indicating the accrual in the vessels per mg of tissue is higher than  
18 that of bone, and at 6 hours normalizes to 1 (Figure 3C).

19           In CKD animals, *de novo* accrual into the vessels correlates strongly with the resident  
20 tissue phosphate as an indicator of VC at 2 and 6 hours ( $r > 0.67$ ,  $p < 0.0001$ ) (Figure 3D-F). At 2  
21 hours within each treatment group, a phase during which absorption is occurring, the correlation  
22 is weak and non-significant. However, at 6 hours following absorption, the correlation

1 strengthens in each group, and there is a strong relationship between *de novo* phosphate and the  
2 total tissue phosphate in all groups, except CON-LP.

3 Liver accrual of phosphate was not impacted by CKD or dietary phosphate, but skin and  
4 lung had substantially more accrual in CKD-HP (Figure 3GIJ). Cardiac muscle, however, had  
5 attenuated phosphate uptake in CKD at 6hrs (Figure 3H)

6 In a non-CKD model of medial VC, administration of 0.5 µg/kg calcitriol for 8 days  
7 resulted in hypercalcemia, transient hyperphosphatemia, suppression of PTH, and marked  
8 elevation in FGF-23 (Figure 4A-D). In the subset of animals sacrificed while the stimulus was  
9 still present, 8 days of calcitriol (Cx) was sufficient to generate substantial medial VC, as  
10 indicated by elevations in arterial calcium and phosphate (Figure 4E-F) and confirmed  
11 histologically by Von Kossa staining (Figure 4G). Thirteen days after the cessation of stimulus  
12 (Post-Cx), circulating parameters of mineral metabolism had normalized, however calcification  
13 was non-reduced and histologically similar to that from animals sacrificed earlier.

14 In response to a 10-minute intravenous infusion of phosphate with tracer  $^{33}\text{PO}_4$ , serum  
15 phosphate elevated similarly in all groups (Figure 5A), and there was a reduction in calcium in  
16 all groups by 20 minutes (Figure 5B). At all time-points, serum calcium was higher in the Cx  
17 group, and in response to the IV phosphate, some animals had a substantial elevation in calcium  
18 at 10 minutes (Figure 5B). Cx animals had a blunted elevation in  $^{33}\text{PO}_4$  compared to controls and  
19 Post-Cx animals (Figure 5C).

20 Estimated tissue accrual of phosphate in response to the phosphate challenge is presented  
21 in Figure 5D. Supplementary Figure 8 is a greyscale depiction. In a mixed effects model, each  
22 tissue was compared between treatment groups (statistics not presented on figure, Supplementary  
23 Table 2). There was no difference between the groups in acute accrual in most tissue groups,

1 specifically bones, kidney, adipose and veins. However, there was a substantial difference in  
2 average arterial accrual, in that calcified animals currently receiving stimulus (Cx) had ~4X more  
3 deposition than controls, and control and calcified animals after the calcification stimulus was  
4 removed (Post-Cx) were not different from each other (Figure 4E). Similarly, there was a  
5 correlation between VC and *de novo* phosphate in both calcified groups, however there was  
6 substantially more phosphate accrual for a given amount of calcification in the Cx group with the  
7 mean ratio lower by ~80% (Figure 5F-G).

8         In order to elucidate the role of a phosphate challenge, as opposed to non-challenged  
9 movement of circulating phosphate, the IV radiolabeled phosphate infusion was compared to a  
10 saline infusion spiked with  $^{33}\text{PO}_4$  (Figure 6A-B). During the time-frame of the IV challenge, the  
11 phosphate load stimulated urinary excretion of phosphate (Figure 6C). Subtracting the mean  
12 accrual of each tissue in the saline group from the phosphate group, we generate the differential  
13 accrual as a result of the phosphate challenge (Figure 6D). As expected, the kidneys exhibited  
14 the greatest difference, followed by bones, and then central and peripheral arteries, and vein. In  
15 order to assess the impact of pre-existing VC on the accrual, we see that in the setting of no-, or  
16 mild-VC, the accrual is similar regardless of whether or not there was a phosphate challenge was  
17 applied, however as calcification progressed, the phosphate challenge preferentially deposited in  
18 the vasculature. (Figure 6E-F).

19

## 20 **Discussion**

21         In the present study, we demonstrate that calcifying vasculature alters the systemic  
22 disposition of a phosphate challenge by acutely depositing phosphate during the process of tissue  
23 and extracellular equilibration thereby buffering circulating phosphate (Figure 7). Using a radio-

1 labelled oral phosphate challenge in a rat model of CKD-MBD, the studies revealed a blunted  
2 rise in circulating  $^{33}\text{PO}_4$ , that associated with differential tissue deposition towards the calcifying  
3 vasculature. We confirmed that tissue accrual was stimulated by an acute phosphate challenge,  
4 given that the same level of deposition did not occur solely with passive disposition of  
5 circulating phosphate. The extent of new transport to the calcifying vasculature correlates to the  
6 pre-existing burden of calcification, and can be substantially attenuated by removing the stimulus  
7 for calcification, indicating it is not a by-product of high hydroxyapatite burden, but the  
8 consequence of an active calcification process.

9         The findings from this study indicate that non-renal clearance of phosphate from the  
10 circulation resulting in accumulation into tissues and extracellular spaces is an important and  
11 regulated process of acute phosphate homeostasis, although the specific mechanisms involved  
12 were not resolved in this study. This finding is consistent with previous results demonstrating in  
13 healthy animals that urinary elimination of a phosphate challenge only achieved 50% by 4 hours,  
14 despite prior normalization of serum phosphate<sup>14</sup>. Similarly, in healthy humans, full clearance of  
15 a phosphate load required approximately 120 hours<sup>15</sup> with no impact on circulating levels.  
16 Although the mechanisms responsible for prolonged, but not permanent phosphate storage, are  
17 not well understood, in CKD, this would likely have unique implications due to the likelihood of  
18 increased duration of storage when there is declining kidney function.

19         Adding tracer amounts of radiolabeled phosphate to a phosphate challenge facilitated the  
20 tracking of phosphate accrued in various compartments. In the CKD model, assessment of  
21 radioactivity in the chyme confirmed that active absorption was still occurring at 2 hours, but  
22 was nearly complete by 6 hours. Gut absorption of phosphate was not measurably altered by  
23 CKD or changes in dietary phosphate, which is similar to previous rat and human findings<sup>8,16,17</sup>.

1 While it has been shown that intestinal NaPi2b is reduced by CKD and elevated dietary  
2 phosphate, functional assessments of phosphate absorption using whole tissue methods show no  
3 impairment in absorption indicating an importance of other compensatory mechanisms, such as  
4 Pit1/2 or paracellular transport in the setting of dietary phosphate sufficiency<sup>18-20</sup>.

5 In healthy animals the substantial deposition of new phosphate in the kidney cortex,  
6 liver, bone and cardiac muscle at 2 hours was further increased by 6 hours despite substantial  
7 urinary excretion during that time frame. In contrast, in healthy animals there was no further  
8 accrual into large arteries between 2 and 6 hours, suggesting a transient deposition in this tissue.

9 In both models of VC used in this study, significant blunting of the rise in circulating  
10 <sup>33</sup>PO<sub>4</sub> following the oral load was associated with substantial arterial accrual. In addition,  
11 increases in *de novo* phosphate accrual into blood vessels was associated with the amount of pre-  
12 existing VC. When the stimulus for calcification was removed in the calcitriol-mediated VC  
13 model, the phosphate accrual in the vessels was substantially attenuated and the circulating  
14 <sup>33</sup>PO<sub>4</sub>, was similar to control animals. A strength of the study is that we were able to reproduce  
15 the findings in two different models of VC, where the stimulus and biomarker are markedly  
16 different, indicating that it is unlikely there is a direct role of uremic abnormalities or measured  
17 circulating factors associated with mineral metabolism. An exception is that FGF-23 that was  
18 elevated in both models, and was reduced when the stimulus for VC was removed in the  
19 calcitriol-mediated model. Both models are histologically similar and both have been reported to  
20 involve osteogenic transdifferentiation<sup>21</sup>: the upregulation of osteogenic markers (RUNX-2,  
21 osteocalcin) and loss of smooth muscle actin<sup>22</sup>, characteristics reflected in the human condition  
22 of medial calcification. This transition to a bone-like phenotype may explain the acquired active  
23 accrual capacity give calcified vasculature and bone had similar accrual per mg of tissue by 6



1 hours. Whether this transition and subsequent acute buffering of phosphate by the vasculature  
2 has physiological impacts on phosphate sensing by other organs (i.e. PTG or bone) or the normal  
3 circadian rhythm of phosphate is interesting and requires further study.

4 In the CKD animals, there was a substantial increase in bone deposition of *de novo*  
5 phosphate at 2 and 6 hours compared to control, which may be reflective of increased exposure  
6 of phosphate due to declined kidney function. Circulating PTH was much higher in the CKD  
7 animals on high phosphate, likely indicating increases in bone turnover, however this did not  
8 translate into impaired acute phosphate bone storage.

9 Intermittent exposure to phosphate may be an important stimulus of negative outcomes  
10 and VC progression, rather than hyperphosphatemia alone. First, it is recognized that medial  
11 vascular calcification occurs prior to chronic hyperphosphatemia in CKD patients<sup>4</sup>. Tani *et al.*  
12 show that chronic fluctuations in dietary phosphate induced much more VC than that same load  
13 of phosphate spread out consistently<sup>6</sup>, thereby indicating the importance of acute post-prandial  
14 elevations in serum phosphate. The current understanding of medial calcification involves  
15 phosphate first entering the VMSCs through Pit-1, and then translocating to the extracellular  
16 matrix through pro-calcific Ca/Pi loaded vesicles<sup>23</sup>. Vascular Pit-1 is necessary for the  
17 development of VC and transdifferentiation of vascular smooth muscle cells (VSMCs) to an  
18 osteoblastic-like phenotype<sup>24</sup>. Transport-independent PiT-1 signalling can induce osteogenic  
19 differentiation, but the transport is required for extracellular matrix calcification<sup>25</sup>. This indicates  
20 that osteogenic differentiation is not sufficient for calcification, but needs to happen in  
21 conjunction with or secondary to, increased phosphate influx, potentially of the type depicted in  
22 this study. While Pit-1 expression has been shown to increase in response to elevated dietary  
23 phosphate in CKD<sup>26</sup>, upregulation of PiT-1 alone is not sufficient for VC, and must happen in

1 conjunction with increased circulating phosphate, as demonstrated by a transgenic mouse model  
2 with upregulated PiT-1, where VC was not present<sup>27</sup>. These fluctuations in phosphate also have  
3 negative consequences on endothelial cells, increasing oxidative stress and inflammatory  
4 responses<sup>28</sup>, both of which have negative consequences on cardiovascular health<sup>3</sup>. Phosphate  
5 fluctuation are a potential mechanism through which more frequent and longer dialysis confer  
6 positive health outcomes, although this has not been well-examined as through medial VC as a  
7 mediator<sup>29</sup>.

8 CKD animals fed a low phosphate diet and lacking measurable calcification had profiles  
9 of vascular deposition at both the 2- and 6-hour time points that were similar to controls despite  
10 the acute change in circulating phosphate similar to CKD high phosphate. In other words, the  
11 circulating phosphate stimulus for deposition is similar but accrual or retention was impaired.  
12 This finding is unlikely to be due to impaired cellular transport, as there is no evidence  
13 suggesting a downregulation of Pit-1 in CKD, and even uremic toxins alone have been shown to  
14 upregulate Pit-1<sup>30</sup>. It could however be a result of impaired retention of phosphate through  
15 upregulated XPR1, the major phosphate export protein, whereby dysfunction leads to brain  
16 calcifications<sup>31</sup>, although it's role in VC had not been studied. Alternatively, this finding may  
17 indicate a successful role calcification inhibitors in making the microenvironment less favourable  
18 to phosphate deposition, such as fetuin A, pyrophosphate, or matrix gla protein<sup>32-34</sup>.

19 Comparison of the phosphate challenge to a radiolabelled saline equivalent allowed us to  
20 compare active acute accrual to passive equilibration with the exchangeable pool of phosphate in  
21 the tissues. Compared to the saline load, which contained similar tracer levels of <sup>33</sup>PO<sub>4</sub>, the  
22 phosphate challenge produced substantially more accrual into the calcified vessels, but not in the  
23 non-calcified vessels. The differential acute accrual of phosphate into only the blood vessels

1 supports the concept that once VC is initiated, it progresses quickly and potentially through a  
2 different mechanism than initiation. In incident dialysis patients, only patients with pre-existing  
3 calcification had significant progression over the first 18 months<sup>35</sup>.

4         These findings have important consequences for dietary management of CKD patients.  
5 Based on 2001-2014 NHANES data, the average adult consumes at least twice the recommended  
6 daily intake of phosphate<sup>36</sup>, whereby approximately 50% is estimated to be derived from high  
7 bioavailable inorganic food additives<sup>37,38</sup>. Inorganic sources, such as food additives, which are  
8 90-100% absorbed, as compared to plant- or meat-derived phosphate, which is much lower (40-  
9 69%)<sup>39</sup>. These inorganic sources of phosphate are quickly absorbed, leading to a more rapid flux  
10 into the circulating pool. Patients with CKD and hyperphosphatemia are instructed to consume  
11 low phosphate diets and prescribed intestinal phosphate binders. Phosphate binder therapy slows  
12 the progression of VC, but some sub analyses have shown its most dramatic effect is on the  
13 progression of pre-existing calcification<sup>40</sup>.

14         In the control HP animals there was a very significant correlation of *de novo* deposition  
15 in the vasculature at 6 hours compared to resident phosphate, despite the lack of VC, that wasn't  
16 present in the LP controls. This finding potentially indicates that dietary phosphate, even in the  
17 setting of healthy kidney function, alters the vascular handling of phosphate, a finding that would  
18 need to be confirmed in larger studies.

19         The novel whole-body physiological approach to assessing the acute phosphate response  
20 allowed comprehensive assessment of tissue deposition, and represents a powerful tool to assess  
21 the sequential steps leading to VC and the impact of vascular-specific interventions. There is  
22 limited evidence to suggest that calcification can regress, so nuanced assessments of activity at  
23 different stages will be important for assessing treatments aimed at limiting progression. The

1 current study was limited in that 1) we did not elucidate the specific mechanism by which this  
2 acute accrual occurs and 2) whether the accrual in this study represents long-term deposition or  
3 temporary storage (i.e. how much, if any, of the acute vascular deposition translated into  
4 increased accrual of VC), which are important area of future research.

5         In summary, this study characterized the role of calcifying arteries in the acute non-renal  
6 clearance of phosphate following a phosphate load in two experimental models of VC. Our data  
7 indicate that calcifying arteries alter the systemic disposition of a phosphate challenge and  
8 acutely deposit substantial phosphate. This study supports the importance of diet as it relates to  
9 acute fluctuations of circulating phosphate and the importance of bioavailability and meal-to-  
10 meal management in CKD patients as a mediator of cardiovascular risk.

1 **Acknowledgements**

2 Study Design: MET, JGEZ, BAS, MAA, RMH. Study Conduct: MET, APL, PSJ, LHL. Data  
3 Collection: MET, APL, PSJ, LHL. Data Analysis: MET, MAA, RMH. Data Interpretation: MET,  
4 MAA, RMH. Drafting Manuscript: MET, APL, MAA. Revising Manuscript and Content: MET,  
5 APL, MAA, RMH. Approving final version of manuscript: MET, APL, PSJ, LHL, BAS, JGEZ,  
6 RMH, MAA. MET takes responsibility for the integrity of the data analysis.

7

8 **Sources of Funding:** Canadian Institutes of Health Research, Queen's University. MET and  
9 JGEZ are supported by Vanier Canada Graduate Scholarship.

10

11 **Disclosures:** RMH and MAA have grant funding from OPKO Health, Renal Division for  
12 projects un-related to the current manuscript. MPP has a significant relationship with OPKO  
13 Health, Renal Division.

## References

1. Detrano R, Guerci AD, Carr JJ, Bild DE, Burke G, Folsom AR, Liu K, Shea S, Szklo M, Bluemke DA, O'Leary DH, Tracy R, Watson K, Wong ND, Kronmal RA. Coronary Calcium as a Predictor of Coronary Events in Four Racial or Ethnic Groups. *New England Journal of Medicine*. 2008;358(13):1336–1345.
2. London GM, Guérin AP, Marchais SJ, Métivier F, Pannier B, Adda H. Arterial media calcification in end-stage renal disease: impact on all-cause and cardiovascular mortality. *Nephrology Dialysis Transplantation*. 2003;18(9):1731–1740.
3. Vervloet MG, Sezer S, Massy ZA, Johansson L, Cozzolino M, Fouque D. The role of phosphate in kidney disease. *Nature Reviews Nephrology*. 2016;13(1):27–38.
4. Adeney KL, Siscovick DS, Ix JH, Seliger SL, Shlipak MG, Jenny NS, Kestenbaum BR. Association of Serum Phosphate with Vascular and Valvular Calcification in Moderate CKD. *Journal of the American Society of Nephrology*. 2009;20(2):381–387.
5. Michigami T, Kawai M, Yamazaki M, Ozono K. Phosphate as a Signaling Molecule and Its Sensing Mechanism. *Physiol Rev*. 2018;98:32.
6. Tani M, Tanaka S, Takamiya K, Sakaue M, Ito M. Effects of repetitive diet-induced fluctuations in plasma phosphorus on vascular calcification and inflammation in rats with early-stage chronic kidney disease. *Journal of Clinical Biochemistry and Nutrition*. 2020;66(2):139–145.
7. Turner ME, White CA, Hopman WM, Ward EC, Jeronimo PS, Adams MA, Holden RM. Impaired Phosphate Tolerance Revealed With an Acute Oral Challenge. *Journal of Bone and Mineral Research*. 2018;33(1):113–122.
8. Weinman EJ, Light PD, Suki WN. Gastrointestinal Phosphate Handling in CKD and Its Association With Cardiovascular Disease. *American Journal of Kidney Diseases*. 2013;62(5):1006–1011.
9. Shobeiri N, Pang J, Adams MA, Holden RM. Cardiovascular disease in an adenine-induced model of chronic kidney disease: the temporal link between vascular calcification and haemodynamic consequences. *Journal of Hypertension*. 2013;31(1):160–168.
10. Kanagasabapathy DAS. WHO: Guidelines on Standard Operating Procedures for Clinical Chemistry. 2000:113.
11. Heresztyn T, Nicholson BC. A colorimetric protein phosphatase inhibition assay for the determination of cyanobacterial peptide hepatotoxins based on the dephosphorylation of phosphovitin by recombinant protein phosphatase 1. *Environmental Toxicology*. 2001;16(3):242–252.
12. Zelt JG, Svajger BA, Quinn K, Turner ME, Lavery KJ, Shum B, Holden RM, Adams MA. Acute Tissue Mineral Deposition in Response to a Phosphate Pulse in Experimental CKD. *Journal of Bone and Mineral Research*. 2018.
13. Proudfoot D, Skepper JN, Shanahan CM, Weissberg PL. Calcification of human vascular cells in vitro is correlated with high levels of matrix Gla protein and low levels of osteopontin expression. *Arteriosclerosis, Thrombosis, and Vascular Biology*. 1998;18(3):379–388.
14. Thomas L, Bettoni C, Knöpfel T, Hernando N, Biber J, Wagner CA. Acute Adaption to Oral or Intravenous Phosphate Requires Parathyroid Hormone. *Journal of the American Society of Nephrology*. 2017;28(3):903–914.
15. Scanni R, vonRotz M, Jehle S, Hulter HN, Krapf R. The Human Response to Acute Enteral and Parenteral Phosphate Loads. *Journal of the American Society of Nephrology*. 2014;25(12):2730–2739.

16. Vorland CJ, Lachcik PJ, Aromeh LO, Moe SM, Chen NX, Gallant KMH. Effect of dietary phosphorus intake and age on intestinal phosphorus absorption efficiency and phosphorus balance in male rats. *PLOS ONE*. 2018;13(11):e0207601.
17. Marks J, Churchill LJ, Srai SK, Biber J, Murer H, Jaeger P, Debnam ES, Unwin RJ, Epithelial Transport and Cell Biology Group. Intestinal phosphate absorption in a model of chronic renal failure. *Kidney International*. 2007;72(2):166–173.
18. Aniteli TM, de Siqueira FR, dos Reis LM, Dominguez WV, de Oliveira EMC, Castelucci P, Moysés RMA, Jorgetti V. Effect of variations in dietary Pi intake on intestinal Pi transporters (NaPi-IIb, PiT-1, and PiT-2) and phosphate-regulating factors (PTH, FGF-23, and MEPE). *Pflügers Archiv - European Journal of Physiology*. 2018.
19. Williams KB, DeLuca HF. Characterization of intestinal phosphate absorption using a novel in vivo method. *American Journal of Physiology-Endocrinology and Metabolism*. 2007;292(6):E1917–E1921.
20. Sabbagh Y, O'Brien SP, Song W, Boulanger JH, Stockmann A, Arbeeney C, Schiavi SC. Intestinal Npt2b Plays a Major Role in Phosphate Absorption and Homeostasis. *Journal of the American Society of Nephrology*. 2009;20(11):2348–2358.
21. Han M-S, Che X, Cho G, Park H-R, Lim K-E, Park N-R, Jin J-S, Jung Y-K, Jeong J-H, Lee I-K, Kato S, Choi J-Y. Functional cooperation between vitamin D receptor and Runx2 in vitamin D-induced vascular calcification. *PLoS One*. 2013;8(12):e83584.
22. Lin M-E, Chen T, Leaf EM, Speer MY, Giachelli CM. Runx2 Expression in Smooth Muscle Cells Is Required for Arterial Medial Calcification in Mice. *The American Journal of Pathology*. 2015;185(7):1958–1969.
23. Yamada S, Giachelli CM. Vascular calcification in CKD-MBD: Roles for phosphate, FGF23, and Klotho. *Bone*.
24. Li Xianwu, Yang Hsueh-Ying, Giachelli Cecilia M. Role of the Sodium-Dependent Phosphate Cotransporter, Pit-1, in Vascular Smooth Muscle Cell Calcification. *Circulation Research*. 2006;98(7):905–912.
25. Chavkin NW, Jun Chia J, Crouthamel MH, Giachelli CM. Phosphate Uptake-Independent Signaling Functions of the Type III Sodium-Dependent Phosphate Transporter, PiT-1, in Vascular Smooth Muscle Cells. *Experimental cell research*. 2015;333(1):39–48.
26. Mizobuchi M, Ogata H, Hatamura I, Koiwa F, Saji F, Shiizaki K, Negi S, Kinugasa E, Ooshima A, Koshikawa S, Akizawa T. Up-regulation of Cbfa1 and Pit-1 in calcified artery of uraemic rats with severe hyperphosphataemia and secondary hyperparathyroidism. *Nephrology Dialysis Transplantation*. 2006;21(4):911–916.
27. Chande S, Ho B, Fetene J, Bergwitz C. Transgenic mouse model for conditional expression of influenza hemagglutinin-tagged human SLC20A1/PIT1. *PLOS ONE*. 2019;14(10):e0223052.
28. Watari E, Taketani Y, Kitamura T, Tanaka T, Ohminami H, Abuduli M, Harada N, Yamanaka-Okumura H, Yamamoto H, Takeda E. Fluctuating plasma phosphorus level by changes in dietary phosphorus intake induces endothelial dysfunction. *Journal of Clinical Biochemistry and Nutrition*. 2015;56(1):35–42.
29. Culeton BF, Walsh M, Klarenbach SW, Mortis G, Scott-Douglas N, Quinn RR, Tonelli M, Donnelly S, Friedrich MG, Kumar A, Mahallati H, Hemmelgarn BR, Manns BJ. Effect of Frequent Nocturnal Hemodialysis vs Conventional Hemodialysis on Left Ventricular Mass and Quality of Life: A Randomized Controlled Trial. *JAMA*. 2007;298(11):1291–1299.
30. Hénaut L, Mary A, Chillon J-M, Kamel S, Massy ZA. The Impact of Uremic Toxins on Vascular Smooth Muscle Cell Function. *Toxins*. 2018;10(6).

31. Legati A, Giovannini D, Nicolas G, López-Sánchez U, Quintáns B, Oliveira JRM, Sears RL, Ramos EM, Spiteri E, Sobrido M-J, Carracedo Á, Castro-Fernández C, Cubizolle S, Fogel BL, Goizet C, et al. Mutations in XPR1 cause primary familial brain calcification associated with altered phosphate export. *Nature Genetics*. 2015;47(6):579–581.
32. Reynolds JL, Skepper JN, McNair R, Kasama T, Gupta K, Weissberg PL, Jahnen-Dechent W, Shanahan CM. Multifunctional roles for serum protein fetuin-a in inhibition of human vascular smooth muscle cell calcification. *Journal of the American Society of Nephrology: JASN*. 2005;16(10):2920–2930.
33. Lomashvili KA, Narisawa S, Millán JL, O’Neill WC. Vascular calcification is dependent on plasma levels of pyrophosphate. *Kidney International*. 2014;85(6):1351–1356.
34. Proudfoot D, Shanahan CM. Molecular mechanisms mediating vascular calcification: role of matrix Gla protein. *Nephrology (Carlton, Vic.)*. 2006;11(5):455–461.
35. Block GA, Spiegel DM, Ehrlich J, Mehta R, Lindbergh J, Dreisbach A, Raggi P. Effects of sevelamer and calcium on coronary artery calcification in patients new to hemodialysis. *Kidney International*. 2005;68(4):1815–1824.
36. McClure S, Chang A, Selvin E, Rebholz C, Appel L. Dietary Sources of Phosphorus among Adults in the United States: Results from NHANES 2001–2014. *Nutrients*. 2017;9(2):95.
37. Gutiérrez OM, Luzuriaga-McPherson A, Lin Y, Gilbert LC, Ha S-W, Beck GR. Impact of Phosphorus-Based Food Additives on Bone and Mineral Metabolism. *The Journal of Clinical Endocrinology & Metabolism*. 2015;100(11):4264–4271.
38. Hill Gallant KM. Studying dietary phosphorus intake: the challenge of when a gram is not a gram. *The American Journal of Clinical Nutrition*. 2015;102(2):237–238.
39. Adema AY, de Borst MH, Ter Wee PM, Vervloet MG, NIGRAM Consortium. Dietary and pharmacological modification of fibroblast growth factor-23 in chronic kidney disease. *Journal of Renal Nutrition: The Official Journal of the Council on Renal Nutrition of the National Kidney Foundation*. 2014;24(3):143–150.
40. Chertow GM, Burke SK, Raggi P, Treat to Goal Working Group. Sevelamer attenuates the progression of coronary and aortic calcification in hemodialysis patients. *Kidney International*. 2002;62(1):245–252.



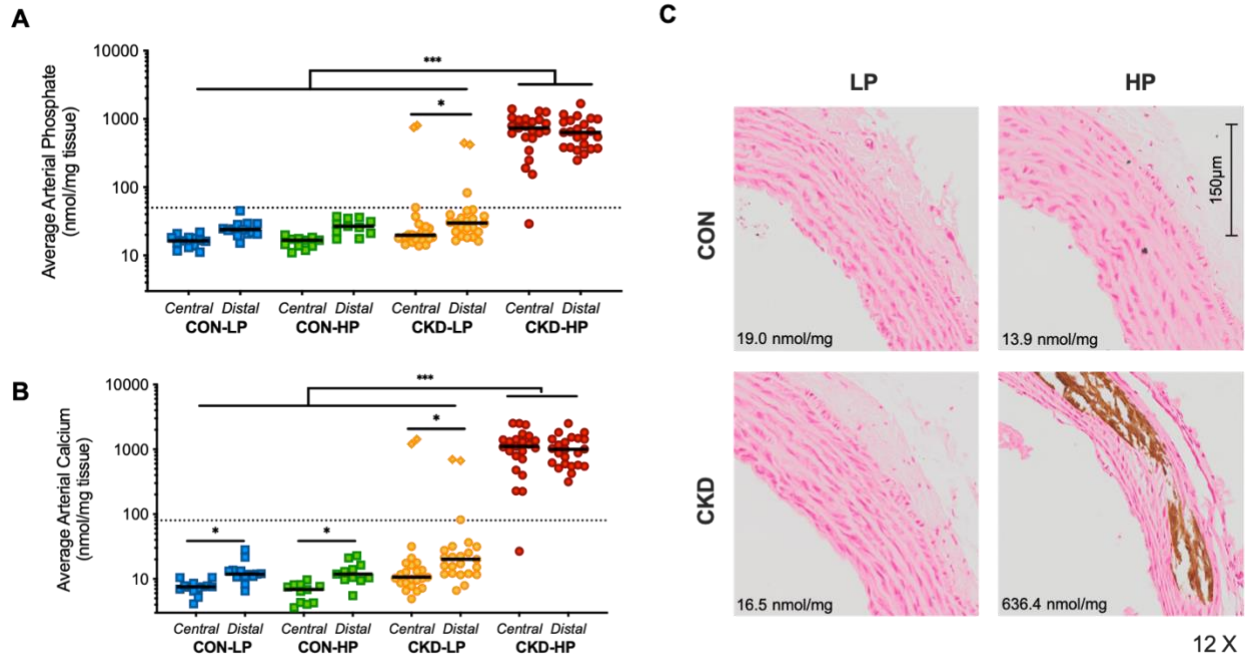

1  
2 **Figure 1: Increased dietary phosphate induces medial vascular calcification in arterial tissue in**  
3 **experimental CKD. (A)** Arterial phosphate and **(B)** calcium per mg of wet weight tissue. Line at median.  
4 Each data point represents the mean of central (N=5) and peripheral (N=10) vessels in each rat. Dotted  
5 line at 50 ng/mg tissue phosphate and 80 ng/mg tissue calcium, the approximate mineral levels needed to  
6 detect vascular calcification histologically via von Kossa staining. Three-way ANOVA on log-transformed  
7 data with *post hoc* Tukey-corrected multiple comparisons. \* $p < 0.05$ , \*\* $p < 0.01$  \*\*\*  $p < 0.001$ . **(C)**  
8 Representative visible aortic medial calcification indicated by von Kossa phosphate staining in only CKD-  
9 HP. Tissue phosphate indicated on image.

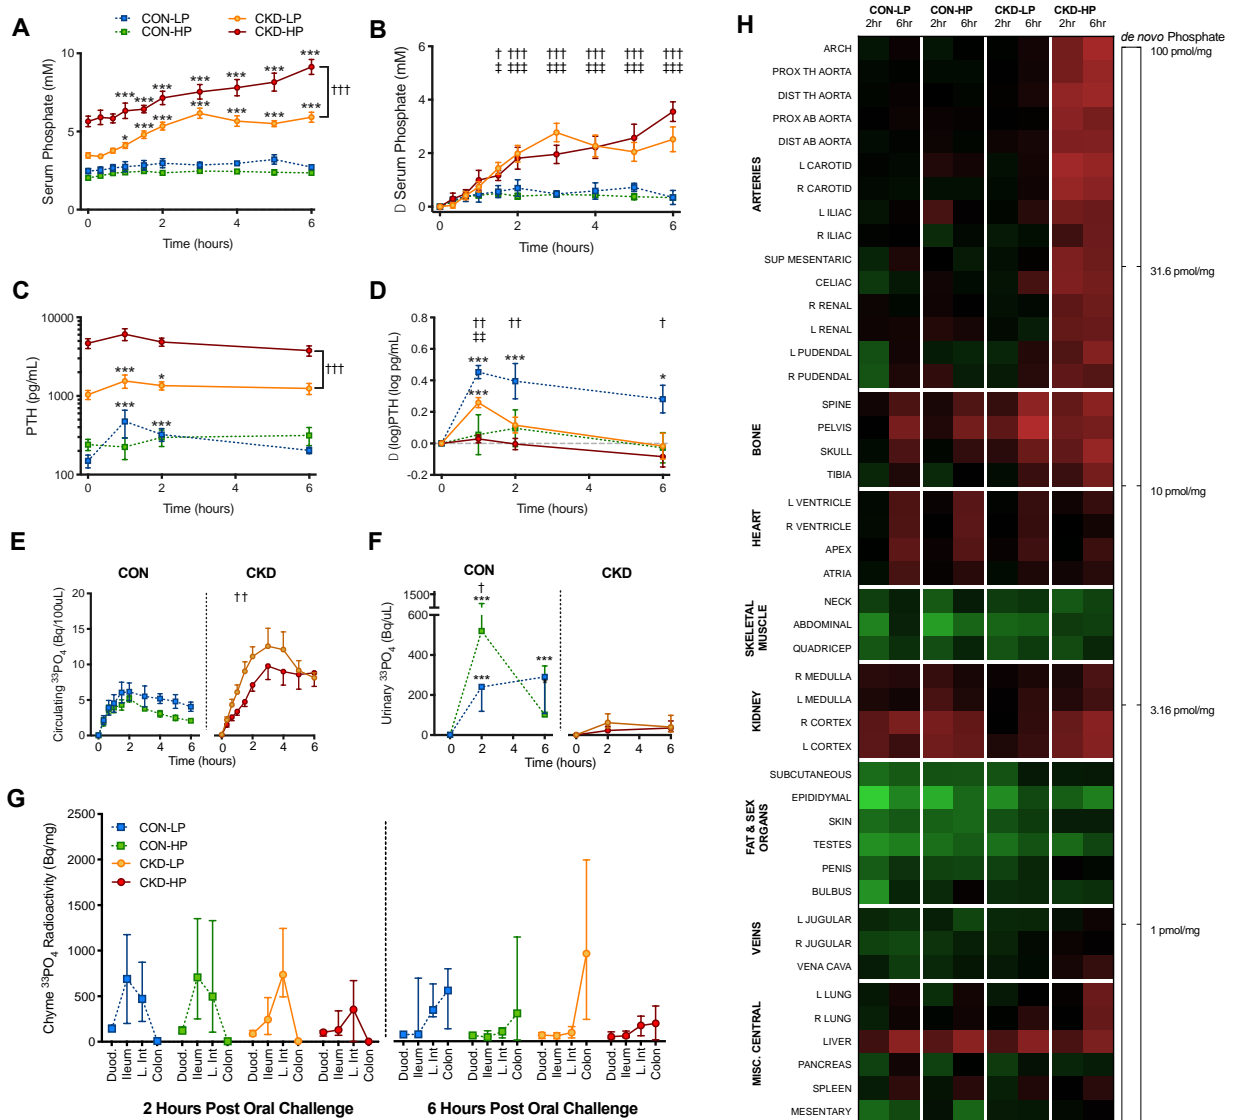

1  
 2 **Figure 2: Acute response and tissue deposition to radiolabeled phosphate challenge altered by**  
 3 **dietary phosphate in experimental model of CKD (A)** Circulating total phosphate, **(B)** absolute change  
 4 in total phosphate, **(C)** circulating PTH, **(D)** absolute change in log-transformed PTH, **(E)** circulating <sup>33</sup>PO<sub>4</sub>  
 5 per 100uL of serum, and **(F)** urinary <sup>33</sup>PO<sub>4</sub> per uL. Repeated measures mixed effects model analysis with  
 6 *post hoc* tests evaluating within-group differences from time 0 (Dunnett's correction; \* p<0.05, \*\*p<0.01,  
 7 \*\*\*p<0.001) and between group differences comparing CKD-LP to CON-LP (†) and CKD-HP to CON-HP  
 8 (‡) at each time point, unless indicated otherwise (Tukey correction; † p<0.05, ††† p<0.001). Data  
 9 expressed as mean ± SEM. Comparisons of PTH panel C, evaluated on log-transformed data. **(G)**  
 10 Change in the profile of radioactive phosphate along the gastrointestinal tract at 2 hours and 6 hours  
 11 following an oral load of radioactive phosphate. Radiolabeled phosphate load along intestinal tract  
 12 indicates at 2 hours following oral load, small intestinal absorption is still occurring, and has finished by 6  
 13 hours in all groups. **(H)** Experimental CKD and dietary phosphate alter tissue disposition of an oral load of  
 14 radiolabeled phosphate. *De novo* tissue phosphate accrual in various tissues across the body at 2 and 6  
 15 hours following oral load grouped by tissue type. The heat map coloration represents the amount of *de*  
 16 *nov*o phosphate accumulated per mg of wet-weight tissue on a logarithmically-transformed scale. Arteries  
 17 sorted by external diameter. For full tissue list see supplementary methods.

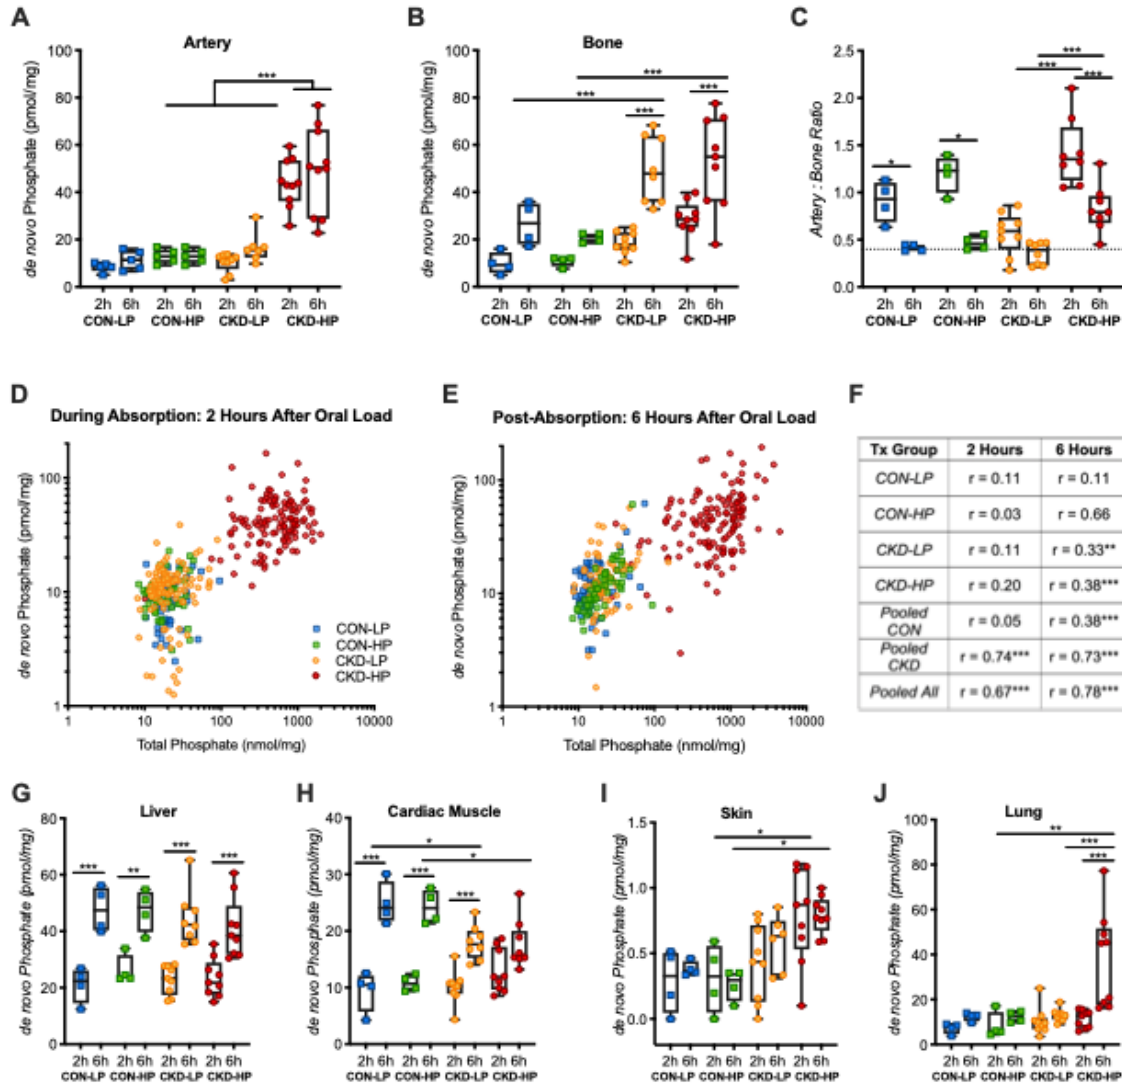

**Figure 3: Calcified vascular tissue is a depot of *de novo* phosphate in the setting of experimental CKD and high dietary phosphate.**

Comparison of *de novo* phosphate deposition in (A) arteries, (B) bone, and (C) the ratio artery:bone at 2 and 6 hours after the oral phosphate. Each data point represents the pooled average of the 15 arterial or 4 bone samples for each individual rat. Dotted line on pane C represents pooled control means at 6 hours. Three-way ANOVA with *post hoc* Sidak-corrected multiple comparisons. \* $p < 0.05$ , \*\* $p < 0.01$ , \*\*\* $p < 0.001$  between data-sets that differed only by one variable. (A) CKD intervention ( $p < 0.001$ ), dietary phosphate ( $p < 0.001$ ), and their interaction ( $p < 0.05$ ) were significant sources of variation. (B) CKD intervention ( $p < 0.001$ ), time of sacrifice ( $p < 0.001$ ), and their interaction ( $p < 0.05$ ), but not dietary phosphate, were significant sources of variation. (C) The interaction of dietary phosphate and CKD intervention ( $p < 0.001$ ), time of sacrifice ( $p < 0.001$ ), dietary phosphate ( $p < 0.001$ ), and their interaction ( $p < 0.05$ ) were significant sources of variation. (D-F) *De novo* phosphate accumulation correlates with present vascular calcification. Change in *de novo* arterial phosphate accumulation as a function of total tissue phosphate at 2 hours (D) and 6 hours (E) following the oral load. Each data point is from a single artery sample (15 different artery samples  $\times$  51 animals = 795 data points). Spearman correlation *r*-values of each group and pooled groups (F). \* $p < 0.05$ , \*\* $p < 0.01$ , \*\*\*\* $p < 0.001$ . Comparison of *de novo* phosphate deposition in (G) liver, (H) cardiac muscle, (I) skin, and (J) lung 2 and 6 hours after the oral phosphate.

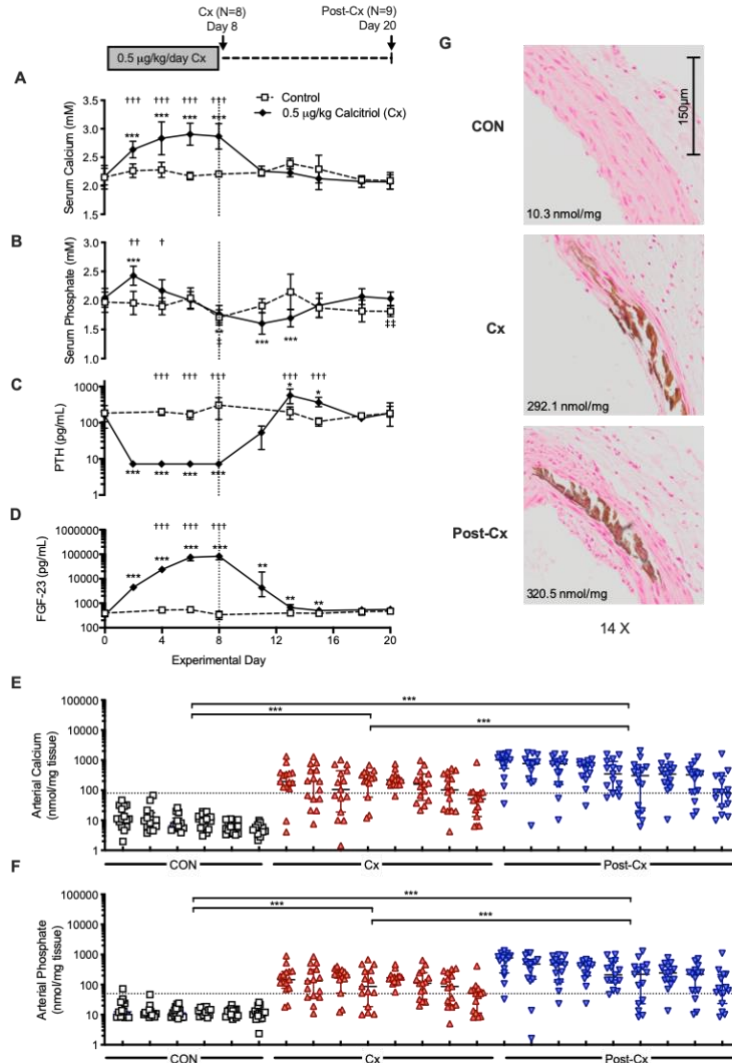

1  
 2 **Figure 4: Persistence of vascular calcification in non-CKD model after removal of the calcification**  
 3 **stimulus and normalization of circulating markers.** Perturbations of circulating **(A)** calcium, **(B)**  
 4 phosphate, **(C)** PTH, **(D)** FGF-23 following dosage of calcitriol (0.5 μg/kg/day) for 8 rats (Cx). After  
 5 cessation of treatment for 12 days, circulating parameters largely returned to normal (Post-Cx). Repeated  
 6 measures mixed effects model analysis with *post hoc* tests evaluating within-group differences from time  
 7 0 (Dunnett's correction; \* p<0.05, \*\*p<0.01, \*\*\*p<0.001) and between group differences comparing Cx to  
 8 Post-Cx (†) (Tukey correction; † p<0.05, ††† p<0.001). Data expressed as mean ± SD (A-B) or median  
 9 IQR (C-D). Comparisons of PTH and FGF-23 evaluated on log-transformed data. Persistent vascular  
 10 calcification, as indicated by **(E)** arterial calcium and **(F)** phosphate after removal of stimulus. Each  
 11 column represents an animal, and each data-point a vascular tissue measured. Dotted line at 50 ng/mg  
 12 tissue phosphate and 80 ng/mg tissue calcium, the mineral levels needed to detect vascular calcification  
 13 histologically via von Kossa staining. Two-way ANOVA on log-transformed data with *post hoc* Tukey-  
 14 corrected multiple comparisons. \*\*\*p<0.001. **(G)** Representative visible medial calcification indicated by  
 15 Von Kossa phosphate staining in both the Cx and Post-Cx rats.

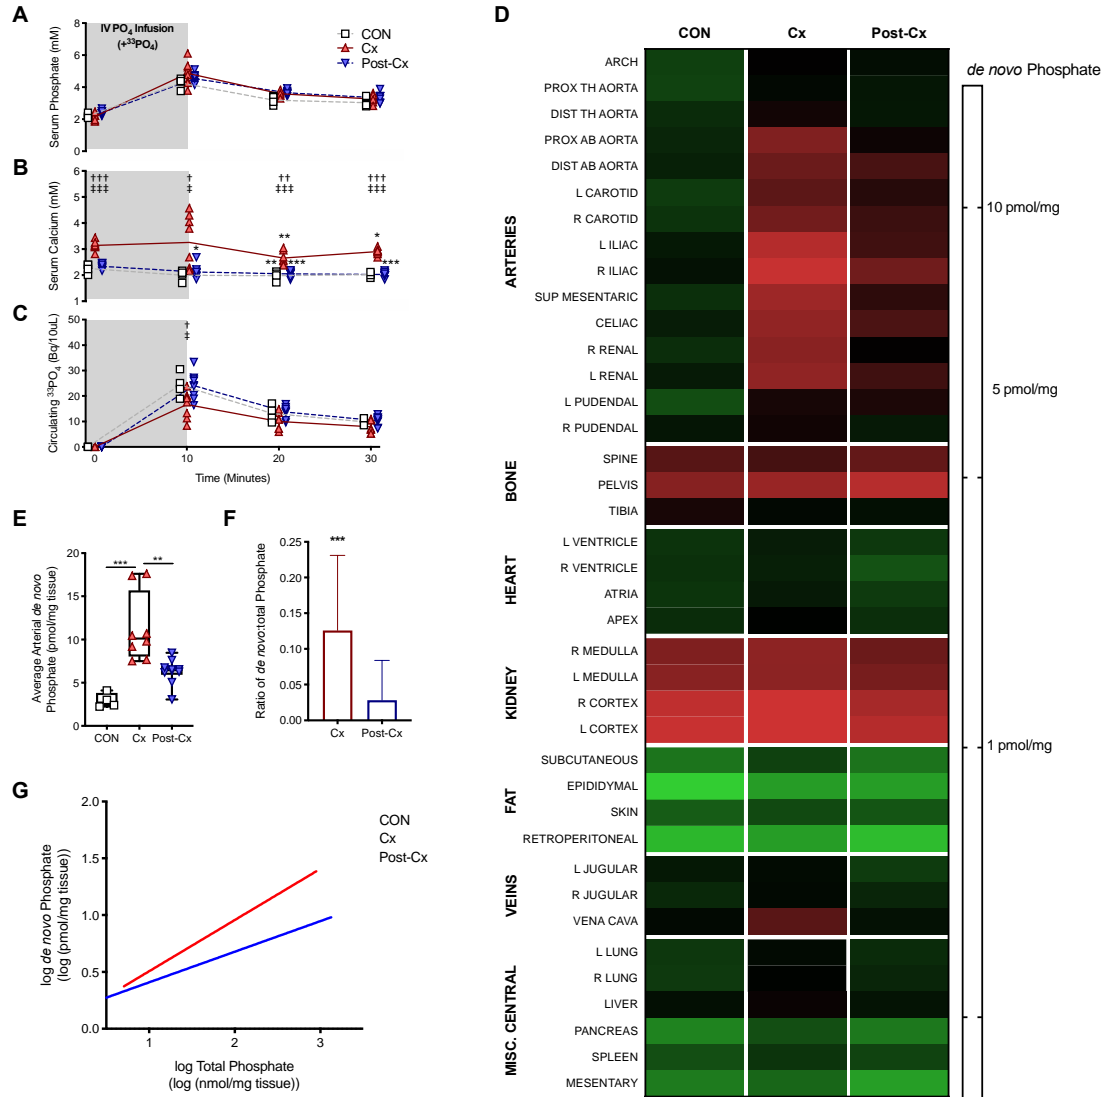

**Figure 5:**

**Presence of a stimulus for calcification differentially impacts acute deposition in calcified vessels**

(A) Circulating phosphate, (B) calcium, and (C) radiolabeled  $^{33}\text{PO}_4$  during and after the IV infusion of a radiolabeled phosphate load. Repeated measures two-way ANOVA with *post hoc* tests comparing Cx – CON(†), and Post-Cx to CON(‡) (Tukey correction; †  $p < 0.05$ , †††  $p < 0.001$ ) and evaluating within-group differences from time 0 (Dunnett’s correction; \*  $p < 0.05$ , \* $p < 0.01$ , \*\*\* $p < 0.001$ ). At no time point was Post-Cx different than CON. At all time-points, serum phosphate and circulating  $^{33}\text{PO}_4$  was higher than at baseline. Line at mean. (D) *De novo* tissue phosphate accrual in various tissues across the body grouped by tissue type. The heat map coloration represents the amount of *de novo* phosphate accumulated per mg of wet-weight tissue on a logarithmically-transformed scale. Arteries sorted by external diameter. For full tissue list see supplementary methods. (E) Average arterial *de novo* phosphate for each animal. Kruskal-Wallis with *post hoc* Dunn’s multiple comparison test (\*\* $p < 0.01$ , \*\*\* $p < 0.001$ ). (F) Ratio of *de novo* arterial phosphate to total arterial phosphate for each vessel. Median, IQR, 95% CI shown. Data points outside 95% CI plotted. Mann-Whitney test (\*\* $p < 0.01$ ). *De novo* phosphate accumulation in arteries plotted against total tissue phosphate following IV infusion. Each data point is from a single artery sample. Log-log linear regression plotted (Cx:  $R^2 = 0.58$ ,  $y = 0.45x + 0.05$ , Post-Cx:  $R^2 = 0.40$ ,  $y = 0.27x + 0.14$ ).

1

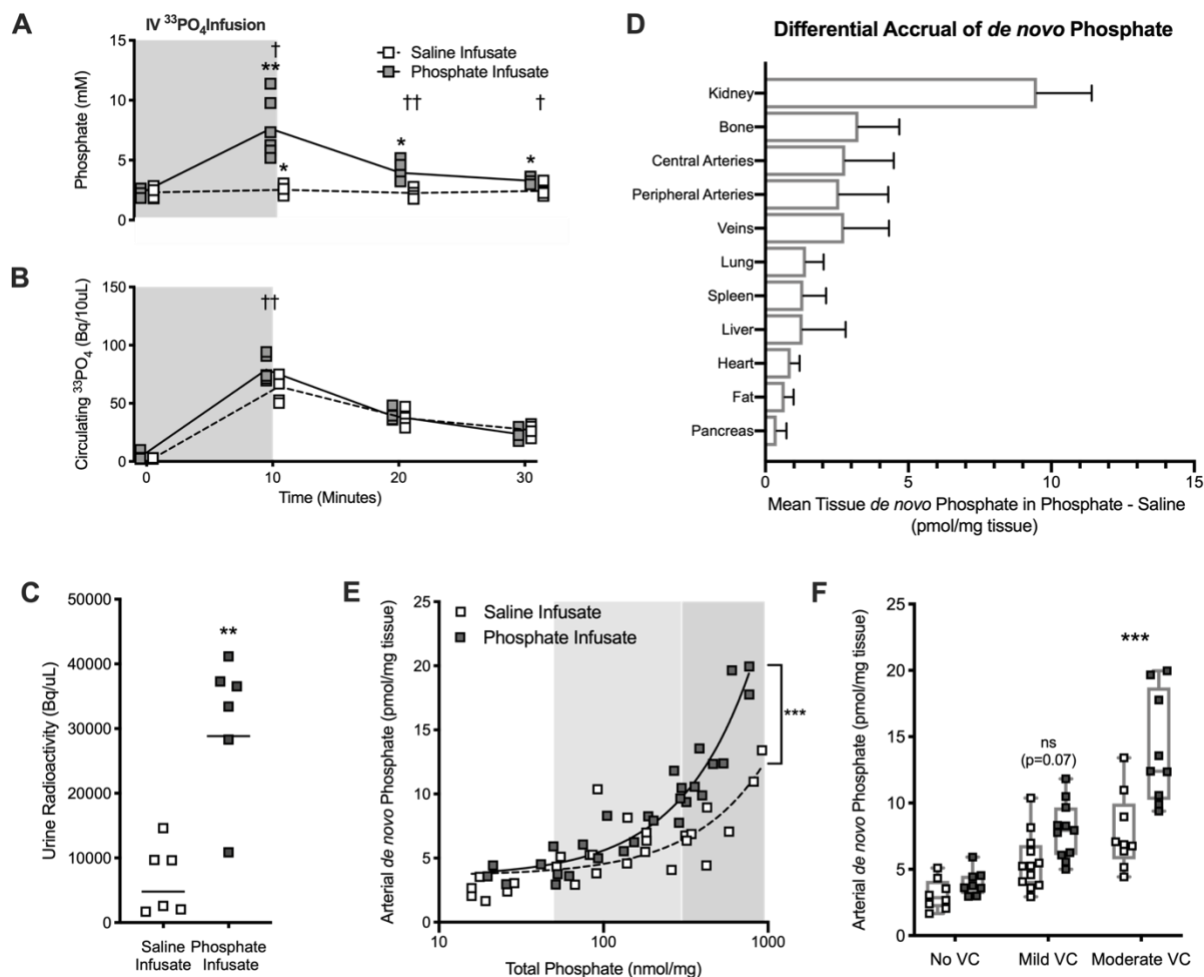

2

3 **Figure 6: Acute phosphate acts as a stimulus for differential vascular deposition in calcified**  
 4 **vessels only (A)** Circulating phosphate and **(B)** radiolabeled  $^{33}\text{PO}_4$  during and after the IV infusion of  
 5 either a radiolabeled phosphate load or saline with tracer. Repeated measures two-way ANOVA with *post*  
 6 *hoc* tests comparing within-group differences from time 0 (Dunnett's correction; \*  $p < 0.05$ , \*\*  $p < 0.01$ ,  
 7 \*\*\*  $p < 0.001$ ) and between infusates at each time point (Sidak correction; †  $p < 0.05$ , ††  $p < 0.01$ , †††  $p < 0.001$ ). Line at  
 8 mean. **(C)** Urine radioactivity compared using Mann-Whitney test, line at geometric mean. **(D)** Differential  
 9 *de novo* phosphate accrual in phosphate versus saline infusion. Mean tissue *de novo* phosphate in saline  
 10 infusion group subtracted from phosphate group. Mean SD. **(E)** *De novo* phosphate accumulation in  
 11 arteries plotted against total tissue phosphate following IV infusion. Each data point is from a single  
 12 central artery sample. Linear regression plotted (Phosphate:  $R^2 = 0.91$ ,  $y = 0.021x + 3.5$ , Saline:  $R^2 = 0.60$ ,  
 13  $y = 0.009x + 3.6$ ). Slopes of lines are significantly different  $p < 0.001$ . **(F)** Calcified vasculature selectively  
 14 accrues more phosphate acutely. Degree of calcification binned according to no VC ( $< 50 \text{ nmol/mg}$ ), mild  
 15 VC ( $50\text{-}300 \text{ nmol/mg}$ ), and moderate VC ( $> 300 \text{ nmol/mg}$ ). Two-way ANOVA with *post hoc* Sidak-corrected  
 16 comparisons between infusates (\*\*  $p < 0.01$ ).  
 17

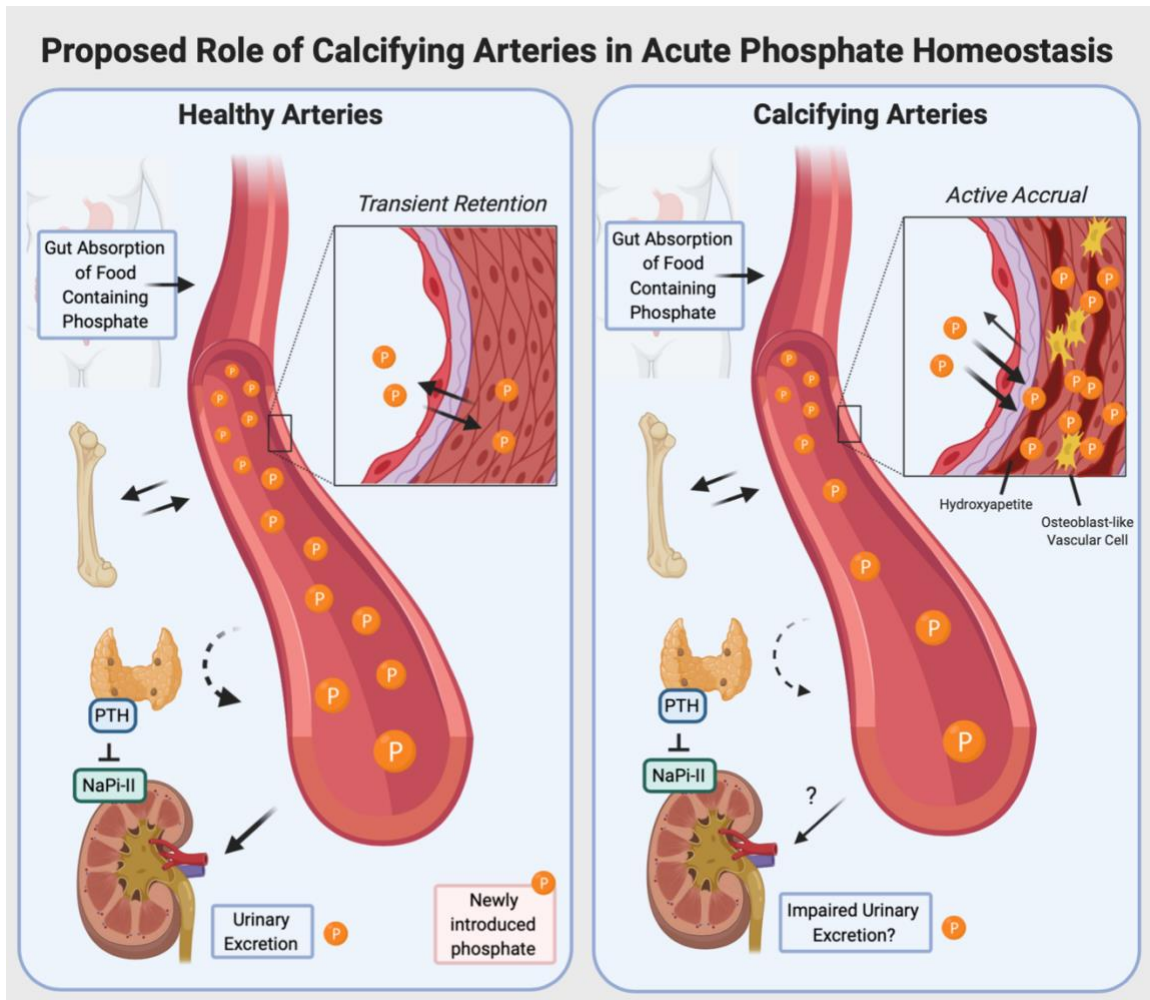

1  
2  
3  
4  
5  
6  
7  
8  
9

**Figure 7: Proposed conceptual framework describing the role of calcifying vasculature in the response to an acute challenge of oral phosphate (i.e. a meal) and consequences.** In the setting of actively calcifying vasculature, elevations in phosphate following an oral absorption of a phosphate containing food item, phosphate is preferentially removed from the circulation and into calcifying vasculature. This blunting of circulating phosphate may have impacts on other aspects of acute hormonal phosphate response (i.e. impairing PTH signalling) and impair timely urinary excretion.

1 **Table 1: CKD-MBD Rat Model Characteristics at Sacrifice**

2

| Treatment Group          | Creatinine ( $\mu\text{M}$ ) | $\text{PO}_4$ (mM)            | Ca (mM)         | PTH (pg/mL)                    | FGF23 (pg/mL)                     | Bodyweight (g)             |
|--------------------------|------------------------------|-------------------------------|-----------------|--------------------------------|-----------------------------------|----------------------------|
| <b>CKD-LP</b>            | 441.4 $\pm$ 100.0<br>4a, 4b  | 3.74 $\pm$ 0.80<br>2a, 4b     | 2.79 $\pm$ 0.52 | 930 [542,1479]<br>4a, 4b       | 4192 [3322,7226]<br>4a, 4b        | 465 $\pm$ 27<br>3a, 1b     |
| <b>CKD-HP</b>            | 512.4 $\pm$ 166.6<br>4a, 4b  | 5.05 $\pm$ 0.98<br>4a, 4b, 4c | 2.47 $\pm$ 0.72 | 3100 [2497,6090]<br>4a, 4b, 4c | 68176 [47507,85767]<br>4a, 4b, 4c | 411 $\pm$ 25<br>4a, 4b, 4c |
| <b>CON-LP</b>            | 41.7 $\pm$ 8.8               | 2.47 $\pm$ 0.62               | 2.51 $\pm$ 0.28 | 131 [99, 220]                  | 326[306,383]                      | 506 $\pm$ 22               |
| <b>CON-HP</b>            | 42.8 $\pm$ 10.4              | 2.04 $\pm$ 0.23               | 2.57 $\pm$ 0.31 | 243 [109, 296]                 | 306[287,320]                      | 497 $\pm$ 28               |
| <i>CKD Intervention</i>  | ***                          | ***                           | ns              | ***                            | ***                               | ***                        |
| <i>Dietary Phosphate</i> | ns                           | ***                           | ns              | ***                            | ***                               | ***                        |
| <i>Interaction</i>       | ns                           | ***                           | ns              | ***                            | ***                               | ***                        |

3

4 Two-way ANOVA with Sidak's multiple comparisons test. <sup>a</sup>Difference from CON-LP <sup>b</sup>Difference from CON-HP <sup>c</sup>Difference from  
5 CKD-LP. PTH. 1b: p<0.05, 2a: p<0.01. 3a: p<0.001, 4a or 4b or 4c: p<0.0001. PTH/FGF-23 represented as median [IQR] and  
6 statistics performed on normalized log-transformed data. Values for phosphate, calcium, PTH reflect directly prior to oral phosphate  
7 load. Significant sources of variation as identified by two-way ANOVA bottom three rows. \*\*\*p<0.001

8
